# Supplementary material
Source: HighWire-hosted journal article supplement (https://thorax.bmj.com/content/thoraxjnl-2019-213547)
Supplement: inline-supplementary-material-1 [file inline-supplementary-material-1.pdf]

**Online Supplement****Comparing treatment effects of a convenient vibratory positional device to CPAP in positional OSA: a crossover randomized controlled trial**

Yingjuan Mok, Alvin Tan, Pon Poh Hsu, Audrey Seow, Yiong Huak Chan, Hang Siang Wong,  
Yvonne Poh, Keith K H Wong

**ADVERSE EVENTS**

A total of 6 adverse events were reported by 5 patients. 2 patients reported facial rash with CPAP use. Both events were mild and attributed to contact irritation from the CPAP mask. 3 patients reported neck itchiness or redness while on PT treatment, of which 2 were possibly due to mild skin irritation from PT. For the 1st patient, the rash resolved spontaneously while for the 2nd patient, the neck itchiness did not recur after a new change of PT device. Both patients were able to continue using their PT devices. The 3rd patient reported a transient rash after 5 uneventful weeks of PT use which resolved with a medicated cream. This event was mild and unlikely to be device related. 1 patient reported neck pain in the first week of PT use which was described as a tension around the neck radiating to the head and upper limbs. These symptoms persisted despite cessation of device use. She was reviewed by the orthopaedics specialist and further imaging of the cervical spine revealed cervical spondylosis. With conservative physiotherapy, her neck pain subsequently resolved.
